# Supplementary material for: Slow relaxation of the magnetization observed in mononuclear Ln–radical compounds with D4d geometry configurations
Source: Royal Society of Chemistry journal article supplement (doi:10.1039/c8dt03809k), 2018-11-27
Supplement: c8dt03809k1.pdf [file c8dt03809k1.pdf]

# Supporting Information

## Slow relaxation of the magnetization observed in mononuclear Ln-radical compounds with $D_{4d}$ geometry configuration

Peng Yun Chen,<sup>a</sup> Ming Ze Wu,<sup>a</sup> Zhong Yi Liu,<sup>a</sup> Li Tian\*<sup>a</sup> and Yi Qun Zhang\*<sup>b</sup>

<sup>a</sup> College of Chemistry, Tianjin Key Laboratory of Structure and Performance for Functional Molecules, Key Laboratory of Inorganic-Organic Hybrid Functional Materials Chemistry, Ministry of Education, Tianjin Normal University, Tianjin 300387, P. R. China. E-mail: lilytianli@hotmail.com

<sup>b</sup> Nanjing Normal Univ, Sch Phys Sci & Technol, Jiangsu Key Lab NSLSCS, Nanjing 210023, Jiangsu, Peoples R China. E-mail: zhangyiquan@njnu.edu.cn

### Table of Contents

|            |                                 |      |
|------------|---------------------------------|------|
| Section S1 | Tables of Crystal Data          | 2-4  |
| Section S2 | Powder X-ray Diffraction (PXRD) | 5    |
| Section S3 | Other crystal structure graphic | 5-7  |
| Section S4 | Other Magnetic Data             | 8-13 |

# 1. Crystallographic Data

Table S1. Crystallographic Data and Structure Refinement Details for **1-3**.

|                                                                                      | <b>1</b>                                                                                       | <b>2</b>                                                                                       | <b>3</b>                                                                                       |
|--------------------------------------------------------------------------------------|------------------------------------------------------------------------------------------------|------------------------------------------------------------------------------------------------|------------------------------------------------------------------------------------------------|
| formula                                                                              | C <sub>50</sub> H <sub>36</sub> F <sub>36</sub> Gd <sub>2</sub> N <sub>8</sub> O <sub>16</sub> | C <sub>50</sub> H <sub>36</sub> F <sub>36</sub> N <sub>8</sub> O <sub>16</sub> Tb <sub>2</sub> | C <sub>50</sub> H <sub>36</sub> Dy <sub>2</sub> F <sub>36</sub> N <sub>8</sub> O <sub>16</sub> |
| Mr                                                                                   | 2003.34                                                                                        | 2006.71                                                                                        | 2013.87                                                                                        |
| crystal system                                                                       | monoclinic                                                                                     | monoclinic                                                                                     | monoclinic                                                                                     |
| space group                                                                          | <i>P2<sub>1</sub>/c</i>                                                                        | <i>P2<sub>1</sub>/c</i>                                                                        | <i>P2<sub>1</sub>/c</i>                                                                        |
| <i>a</i> (Å)                                                                         | 22.7171(4)                                                                                     | 22.4759(11)                                                                                    | 22.3377(12)                                                                                    |
| <i>b</i> (Å)                                                                         | 17.7935(3)                                                                                     | 17.6489(7)                                                                                     | 17.6000(7)                                                                                     |
| <i>c</i> (Å)                                                                         | 18.7601(4)                                                                                     | 18.5888(9)                                                                                     | 18.5483(10)                                                                                    |
| $\alpha$ (°)                                                                         | 90                                                                                             | 90                                                                                             | 90                                                                                             |
| $\beta$ (°)                                                                          | 109.425(2)                                                                                     | 108.609(5)                                                                                     | 108.210(6)                                                                                     |
| $\gamma$ (°)                                                                         | 90                                                                                             | 90                                                                                             | 90                                                                                             |
| <i>V</i> (Å <sup>3</sup> )                                                           | 7151.5(2)                                                                                      | 6988.2(6)                                                                                      | 6927.0(6)                                                                                      |
| <i>Z</i>                                                                             | 4                                                                                              | 4                                                                                              | 4                                                                                              |
| $\rho$ calc (Mg/m <sup>3</sup> )                                                     | 1.861                                                                                          | 1.907                                                                                          | 1.931                                                                                          |
| $\mu$ (mm <sup>-1</sup> )                                                            | 13.351                                                                                         | 11.339                                                                                         | 2.306                                                                                          |
| <i>F</i> (000)                                                                       | 3888                                                                                           | 3896                                                                                           | 3904                                                                                           |
| $\theta$ range(°)                                                                    | 3.52~67.08                                                                                     | 3.54~67.08                                                                                     | 2.071~25.008                                                                                   |
| GOF on <i>F</i> <sup>2</sup>                                                         | 1.021                                                                                          | 1.047                                                                                          | 1.030                                                                                          |
| <i>R</i> <sub>1</sub> / <i>wR</i> <sub>2</sub> [ <i>I</i> > 2 $\sigma$ ( <i>I</i> )] | 0.0600, 0.1535                                                                                 | 0.1074, 0.2835                                                                                 | 0.0524, 0.1201                                                                                 |
| <i>R</i> <sub>1</sub> / <i>wR</i> <sub>2</sub> (all data)                            | 0.0841, 0.1696                                                                                 | 0.1449, 0.3215                                                                                 | 0.0822, 0.1475                                                                                 |

Table S2. Lanthanide geometry analysis by *SHAPE* software

| Ln(III)         | <i>D</i> <sub>2d</sub> -DD | <i>C</i> <sub>2v</sub> -TP | <i>D</i> <sub>4d</sub> -AP |
|-----------------|----------------------------|----------------------------|----------------------------|
| Gd1( <b>1</b> ) | 1.273                      | 2.420                      | 0.647                      |
| Gd2( <b>1</b> ) | 1.378                      | 2.097                      | 0.534                      |
| Tb1( <b>2</b> ) | 1.483                      | 1.714                      | 0.564                      |
| Tb2( <b>2</b> ) | 1.620                      | 2.007                      | 0.380                      |
| Dy1( <b>3</b> ) | 1.538                      | 1.730                      | 0.536                      |
| Dy2( <b>3</b> ) | 1.749                      | 2.066                      | 0.333                      |

Table S3. Selected bond lengths (Å) and bond angles (°) in complex 1.

|                 |            |                   |            |
|-----------------|------------|-------------------|------------|
| Gd(1)-O(1)      | 2.311(5)   | O(3)-Gd(1)-O(4)   | 71.82(16)  |
| Gd(1)-O(3)      | 2.360(5)   | O(3)-Gd(1)-O(5)   | 77.16(16)  |
| Gd(1)-O(4)      | 2.384(5)   | O(3)-Gd(1)-O(7)   | 140.27(17) |
| Gd(1)-O(5)      | 2.402(5)   | O(4)-Gd(1)-O(5)   | 123.99(16) |
| Gd(1)-O(6)      | 2.359(5)   | O(4)-Gd(1)-N(3)   | 133.36(18) |
| Gd(1)-O(7)      | 2.371(4)   | O(5)-Gd(1)-N(3)   | 74.22(18)  |
| Gd(1)-O(8)      | 2.383(5)   | O(6)-Gd(1)-O(3)   | 109.28(17) |
| Gd(1)-N(3)      | 2.546(6)   | O(6)-Gd(1)-O(4)   | 75.39(16)  |
| Gd(2)-O(9)      | 2.334(6)   | O(6)-Gd(1)-O(8)   | 79.74(17)  |
| Gd(2)-O(11)     | 2.359(5)   | O(6)-Gd(1)-N(3)   | 145.32(17) |
| Gd(2)-O(12)     | 2.367(5)   | O(8)-Gd(1)-N(3)   | 118.97(18) |
| Gd(2)-O(13)     | 2.380(5)   | N(1)-O(1)-Gd(1)   | 141.3(4)   |
| Gd(2)-O(14)     | 2.377(5)   | O(9)-Gd(2)-O(11)  | 78.97(19)  |
| Gd(2)-O(15)     | 2.379(5)   | O(9)-Gd(2)-O(12)  | 81.9(2)    |
| Gd(2)-O(16)     | 2.363(5)   | O(9)-Gd(2)-O(14)  | 144.47(17) |
| Gd(2)-N(5)      | 2.542(6)   | O(11)-Gd(2)-O(12) | 71.61(17)  |
| O(1)-Gd(1)-O(3) | 82.38(19)  | O(12)-Gd(2)-O(13) | 119.15(17) |
| O(1)-Gd(1)-O(4) | 77.27(18)  | O(15)-Tb(2)-O(11) | 138.0(3)   |
| O(1)-Gd(1)-O(5) | 142.39(16) | O(15)-Tb(2)-O(14) | 111.9(3)   |
| O(1)-Gd(1)-O(6) | 144.76(17) | O(16)-Tb(2)-O(13) | 119.2(3)   |
| O(1)-Gd(1)-O(7) | 110.4(20)  | O(11)-Gd(2)-N(5)  | 134.04(18) |
| O(1)-Gd(1)-O(8) | 74.02(18)  | O(12)-Gd(2)-N(5)  | 71.37(17)  |
| O(1)-Gd(1)-N(3) | 69.57(18)  | N(7)-O(9)-Gd(2)   | 138.8(4)   |

Table S4. Selected bond lengths (Å) and bond angles (°) in complex 2.

|             |           |                  |          |
|-------------|-----------|------------------|----------|
| Tb(1)-O(1)  | 2.289(8)  | O(3)-Tb(1)-O(4)  | 72.0(3)  |
| Tb(1)-O(3)  | 2.352(9)  | O(3)-Tb(1)-O(6)  | 144.6(3) |
| Tb(1)-O(4)  | 2.346(8)  | O(3)-Tb(1)-O(5)  | 79.2(3)  |
| Tb(1)-O(5)  | 2.365(9)  | O(4)-Tb(1)-O(6)  | 141.6(3) |
| Tb(1)-O(6)  | 2.357(7)  | O(4)-Tb(1)-O(8)  | 109.3(3) |
| Tb(1)-O(7)  | 2.375(8)  | O(4)-Tb(1)-O(5)  | 145.3(3) |
| Tb(1)-O(8)  | 2.335(8)  | O(5)-Tb(1)-O(7)  | 136.5(3) |
| Tb(1)-N(3)  | 2.531(11) | O(5)-Tb(1)-O(6)  | 71.0(2)  |
| Tb(2)-O(9)  | 2.329(8)  | O(6)-Tb(1)-O(8)  | 80.7(3)  |
| Tb(2)-O(11) | 2.349(9)  | O(4)-Tb(1)-N(3)  | 71.9(3)  |
| Tb(2)-O(12) | 2.342(9)  | O(8)-Tb(1)-N(3)  | 144.9(3) |
| Tb(2)-O(13) | 2.368(9)  | N(1)-O(1)-Tb(1)  | 140.5(7) |
| Tb(2)-O(14) | 2.345(9)  | O(9)-Tb(2)-O(11) | 112.8(3) |

|                 |           |                   |          |
|-----------------|-----------|-------------------|----------|
| Tb(2)-O(15)     | 2.332(8)  | O(9)-Tb(2)-O(12)  | 76.1(3)  |
| Tb(2)-O(16)     | 2.349(8)  | O(12)-Tb(2)-O(11) | 72.5(3)  |
| Tb(2)-N(7)      | 2.524(11) | O(14)-Tb(2)-O(11) | 81.6(3)  |
| O(1)-Tb(1)-O(3) | 76.3(3)   | O(14)-Tb(2)-O(16) | 74.7(3)  |
| O(1)-Tb(1)-O(4) | 81.3(3)   | O(15)-Tb(2)-O(11) | 138.0(3) |
| O(1)-Tb(1)-O(5) | 73.3(3)   | O(15)-Tb(2)-O(14) | 111.9(3) |
| O(1)-Tb(1)-O(7) | 103.9(2)  | O(16)-Tb(2)-O(13) | 119.2(3) |
| O(1)-Tb(1)-O(8) | 144.2(3)  | O(11)-Tb(2)-N(7)  | 75.3(3)  |
| O(1)-Tb(1)-O(6) | 112.6(3)  | O(13)-Tb(2)-N(7)  | 75.6(3)  |
| O(1)-Tb(1)-N(3) | 70.7(3)   | N(5)-O(9)-Tb(2)   | 135.8(8) |

Table S5. Selected bond lengths (Å) and bond angles (°) in complex **3**.

|                 |            |                   |            |
|-----------------|------------|-------------------|------------|
| Dy(1)-O(1)      | 2.283(5)   | O(3)-Dy(1)-O(6)   | 109.42(18) |
| Dy(1)-O(3)      | 2.316(5)   | O(3)-Dy(1)-O(7)   | 141.13(17) |
| Dy(1)-O(4)      | 2.347(5)   | O(3)-Dy(1)-O(8)   | 145.31(17) |
| Dy(1)-O(5)      | 2.368(5)   | O(3)-Dy(1)-N(3)   | 72.42(19)  |
| Dy(1)-O(6)      | 2.341(5)   | O(4)-Dy(1)-O(7)   | 144.55(17) |
| Dy(1)-O(7)      | 2.342(5)   | O(5)-Dy(1)-O(7)   | 141.13(17) |
| Dy(1)-O(8)      | 2.354(5)   | O(4)-Dy(1)-N(3)   | 134.43(19) |
| Dy(1)-N(3)      | 2.516(6)   | O(5)-Dy(1)-O(6)   | 73.09(17)  |
| Dy(2)-O(9)      | 2.324(5)   | O(6)-Dy(1)-O(7)   | 80.78(18)  |
| Dy(2)-O(11)     | 2.333(5)   | O(6)-Dy(1)-N(3)   | 145.69(18) |
| Dy(2)-O(12)     | 2.337(5)   | N(1)-O(1)-Dy(1)   | 140.4(4)   |
| Dy(2)-O(13)     | 2.350(5)   | O(9)-Dy(2)-O(11)  | 113.03(18) |
| Dy(2)-O(14)     | 2.349(5)   | O(9)-Dy(2)-O(12)  | 75.85(19)  |
| Dy(2)-O(15)     | 2.330(5)   | O(9)-Dy(2)-O(13)  | 143.69(17) |
| Dy(2)-O(16)     | 2.315(5)   | O(9)-Dy(2)-O(14)  | 142.31(17) |
| Dy(2)-N(7)      | 2.499(6)   | O(9)-Dy(2)-N(7)   | 70.53(18)  |
| O(1)-Dy(1)-O(4) | 76.66(18)  | O(11)-Dy(2)-O(12) | 72.56(17)  |
| O(1)-Dy(1)-O(5) | 142.72(17) | O(11)-Dy(2)-O(13) | 81.56(18)  |
| O(1)-Dy(1)-O(6) | 143.56(17) | O(11)-Dy(2)-N(7)  | 74.77(19)  |
| O(1)-Dy(1)-O(7) | 112.92(19) | O(12)-Dy(2)-O(13) | 77.64(19)  |
| O(1)-Dy(1)-O(3) | 81.55(19)  | O(12)-Dy(2)-O(14) | 136.66(18) |
| O(1)-Dy(1)-O(8) | 72.88(19)  | O(13)-Dy(2)-O(16) | 72.64(17)  |
| O(1)-Dy(1)-N(3) | 70.48(19)  | O(15)-Dy(2)-O(16) | 72.64(17)  |
| O(3)-Dy(1)-O(4) | 72.28(16)  | O(16)-Dy(2)-N(7)  | 72.20(18)  |
| O(3)-Dy(1)-O(5) | 76.76(17)  | N(5)-(O9)-Dy(2)   | 135.4(4)   |

## 2. Powder X-ray Diffraction (PXRD)

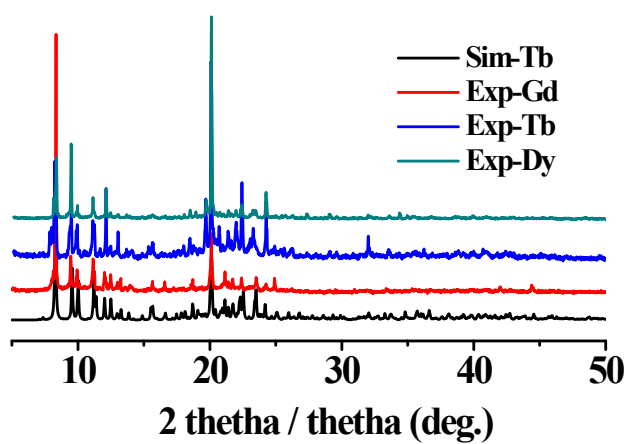

Figure S1. Powder X-ray diffractions of 1-3.

## 3. Other crystal structure graphic

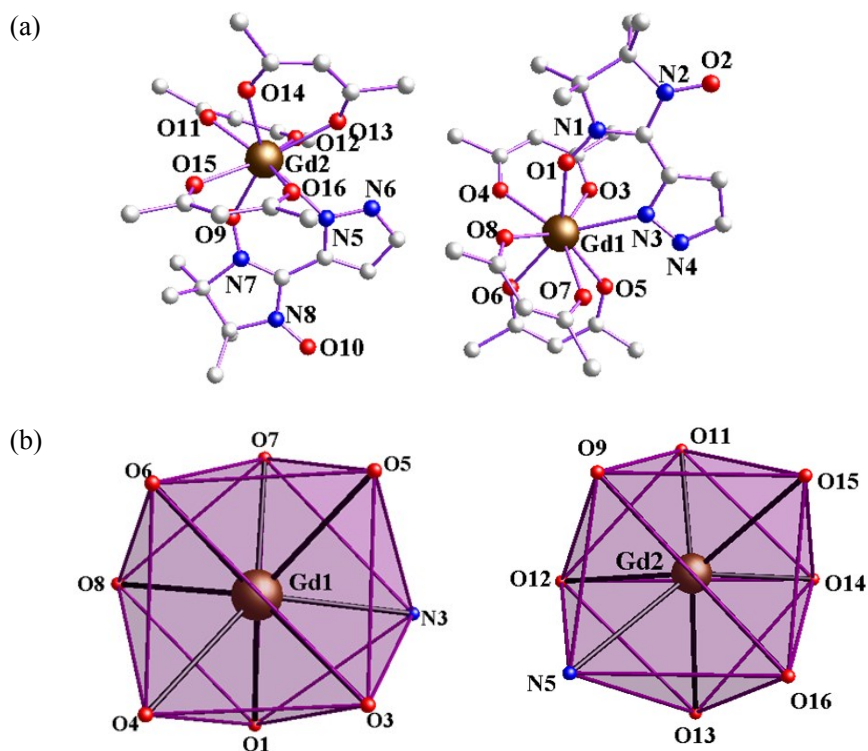

Figure S2. (a) Simplified view of the crystal structure of 1. Fluorine and hydrogen atoms are omitted for clarity. (b)  $D_{4d}$ -symmetry polyhedral of the central gadolinium atoms.

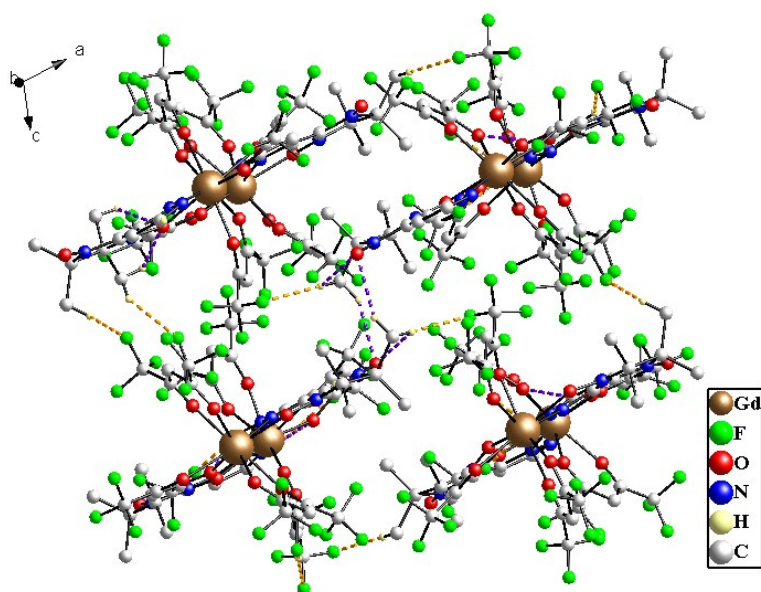

**Figure S3.** The 3D supermolecular framework via C–H··F (brown dashed lines) and C–H··O (purple dashed lines) hydrogen bonds in **1**.

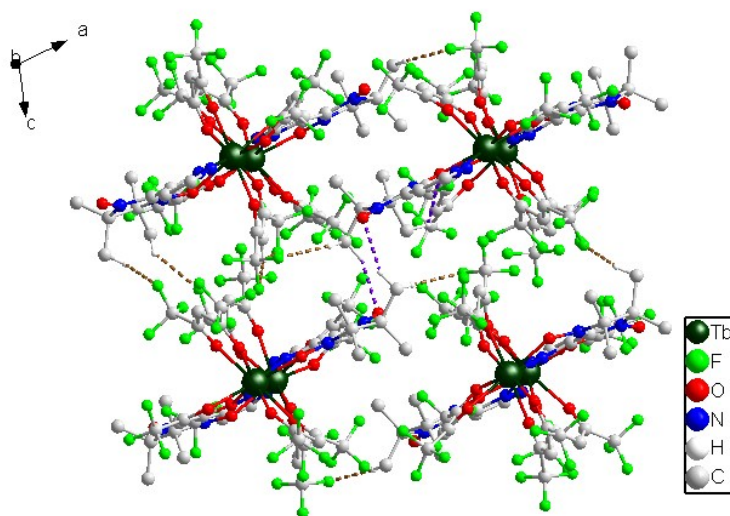

**Figure S4.** The 3D supermolecular framework via C–H··F (brown dashed lines) and C–H··O (purple dashed lines) hydrogen bonds in **2**.

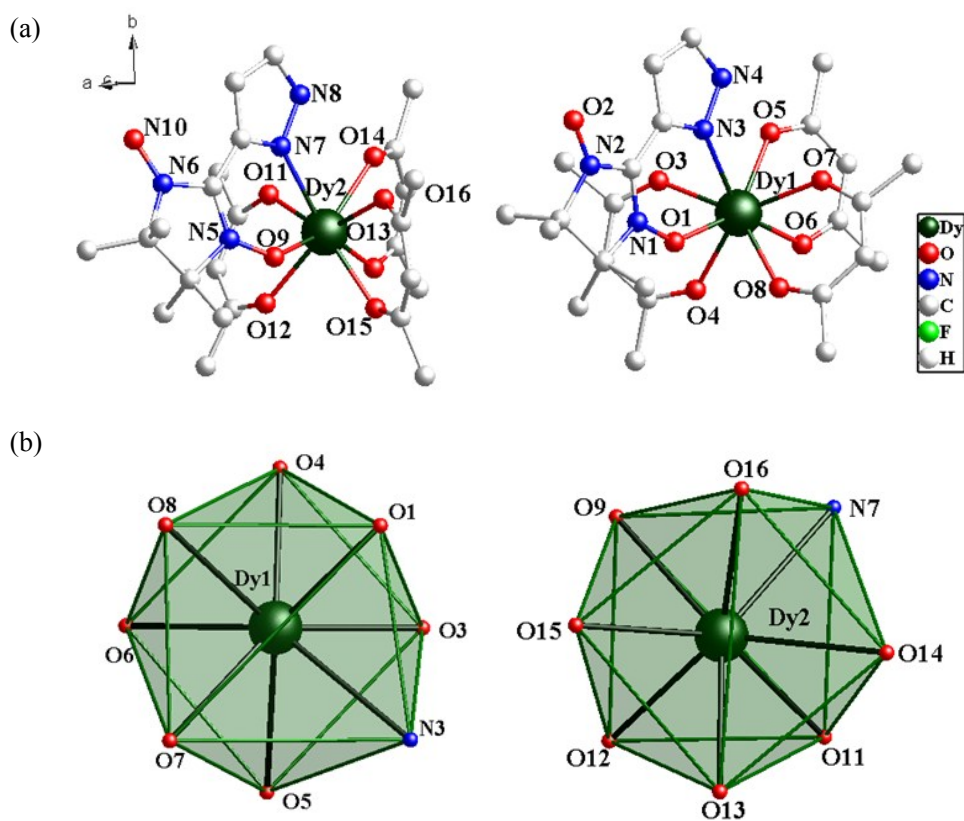

**Figure S5.** (a) Simplified view of the crystal structure of **3**. Fluorine and hydrogen atoms are omitted for clarity. (b)  $D_{4d}$ -symmetry polyhedral of the central dysprosium atoms.

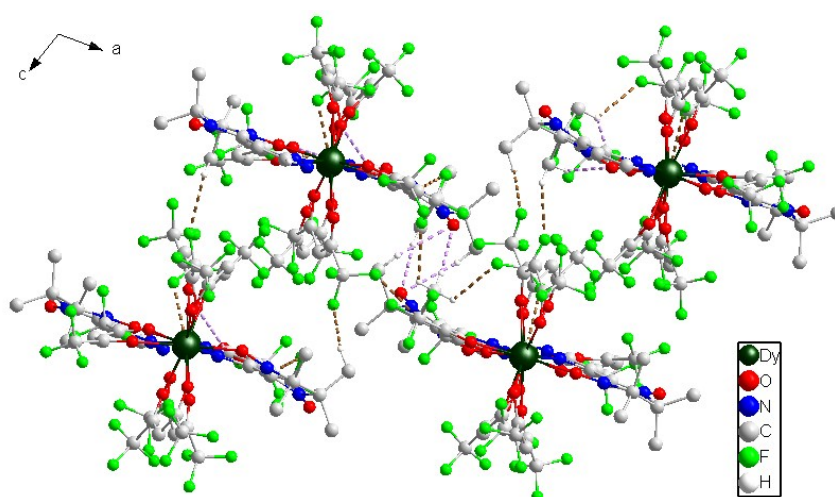

**Figure S6.** The 3D supermolecular framework via C–H··F (brown dashed lines) and C–H··O (purple dashed lines) hydrogen bonds in **3**.

## 4. Other Magnetic Data

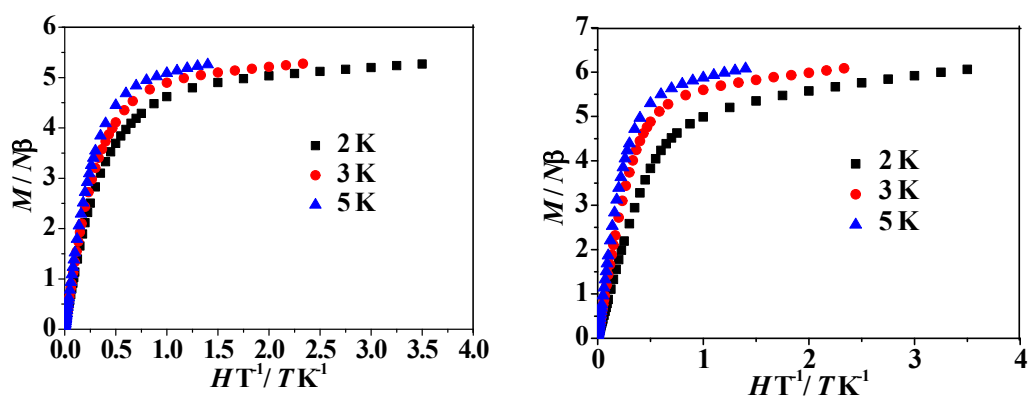

**Figure S7.** Field dependence of the magnetization at 2, 3, and 5 K for complexes **2** (left) and **3** (right).

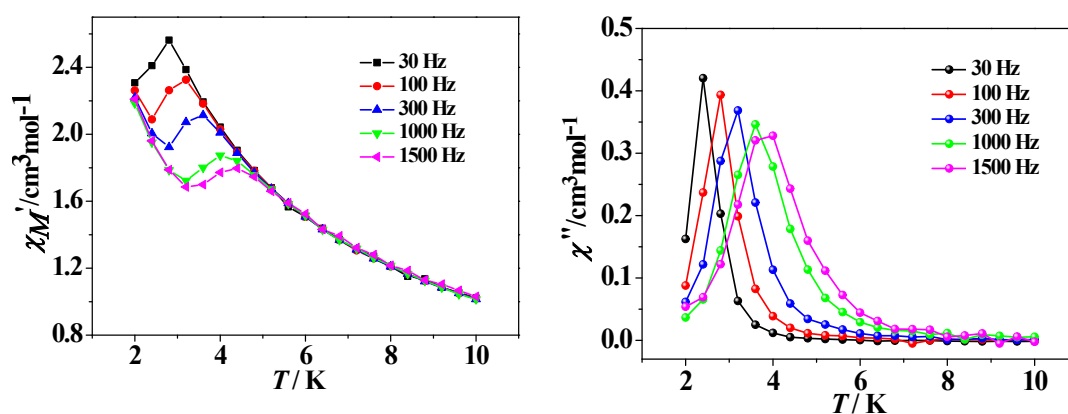

**Figure S8.** Temperature dependencies of the in-phase ( $\chi'$ ) and out-of-phase signals ( $\chi''$ ) components of the ac magnetic susceptibility for **2** at zero dc fields with an oscillation of 3.0 Oe.



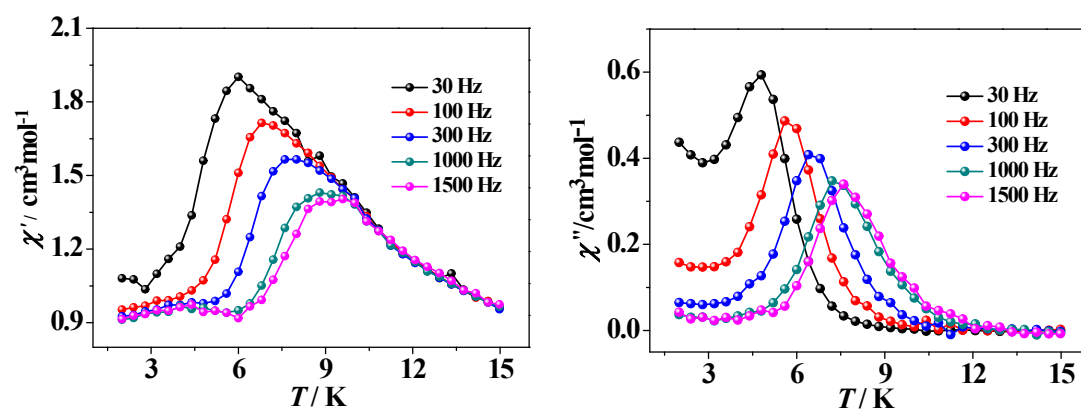

**Figure S9.** Temperature dependencies of the in-phase ( $\chi'$ , left) and out-of-phase signals ( $\chi''$ , right) components of the ac magnetic susceptibility for **3** at zero dc fields with an oscillation of 3.0 Oe.

**Table S6.** Relaxation fitting parameters from the least-square fitting of the Cole-Cole plots of **2** and **3** according to the generalized Debye model.

| Compound 2      |                                               |                                               |                   |          |
|-----------------|-----------------------------------------------|-----------------------------------------------|-------------------|----------|
| Temperature / K | $\chi_S / \text{cm}^3\text{mol}^{-1}\text{K}$ | $\chi_T / \text{cm}^3\text{mol}^{-1}\text{K}$ | $\tau / \text{s}$ | $\alpha$ |
| 2               | 2.3973                                        | 3.5204                                        | 0.0396            | 0.1817   |
| 2.2             | 2.2115                                        | 3.2885                                        | 0.0154            | 0.1381   |
| 2.4             | 2.2332                                        | 3.2685                                        | 0.0057            | 0.1145   |
| 2.6             | 2.4562                                        | 3.4438                                        | 0.0025            | 0.0981   |
| 2.8             | 2.4308                                        | 3.3692                                        | 0.0012            | 0.0799   |
| 3               | 2.4556                                        | 3.3444                                        | 6.8991E-4         | 0.0603   |
| 3.2             | 2.4753                                        | 3.3247                                        | 4.1230E-4         | 0.0477   |
| 3.4             | 2.1000                                        | 2.8999                                        | 2.6626E-4         | 0.0336   |
| 3.6             | 2.1148                                        | 2.8852                                        | 1.7771E-4         | 0.0252   |
| 3.8             | 2.3792                                        | 3.1208                                        | 1.1294E-4         | 0.0258   |
| 4.0             | 2.1419                                        | 2.8581                                        | 8.7743E-5         | 0.0169   |
| Compound 3      |                                               |                                               |                   |          |
| Temperature / K | $\chi_S / \text{cm}^3\text{mol}^{-1}\text{K}$ | $\chi_T / \text{cm}^3\text{mol}^{-1}\text{K}$ | $\tau / \text{s}$ | $\alpha$ |
| 2               | 1.4288                                        | 3.5712                                        | 0.0280            | 0.0591   |
| 3               | 1.6726                                        | 3.3274                                        | 0.0229            | 0.0518   |
| 4               | 1.1813                                        | 3.1868                                        | 0.0130            | 0.0442   |
| 5               | 1.9227                                        | 3.0772                                        | 0.0048            | 0.0434   |
| 5.5             | 1.9674                                        | 3.0326                                        | 0.0026            | 0.0516   |
| 6               | 2.0023                                        | 2.9977                                        | 0.0014            | 0.0700   |
| 6.5             | 2.0357                                        | 2.9643                                        | 6.7595E-4         | 0.0927   |
| 7               | 2.0644                                        | 2.9356                                        | 3.4714E-4         | 0.1183   |
| 7.5             | 2.0897                                        | 2.9103                                        | 1.8298E-4         | 0.1433   |
| 8               | 2.1295                                        | 2.8705                                        | 1.0650E-4         | 0.1491   |
| 9               | 2.0347                                        | 2.6950                                        | 8.3596E-5         | 0.0455   |
